# Supplementary material for: Dynamic integration of forward planning and heuristic preferences during multiple goal pursuit
Source: PubMed Central journal article supplement (PMC7048318; doi:10.1371/journal.pcbi.1007685), 2020-02-18
Supplement: pcbi.1007685.s001.pdf [file pcbi.1007685.s001.pdf]

| Offer | Points                   | Response | Classification |
|-------|--------------------------|----------|----------------|
| Ab    | $Pts_t^A - Pts_t^B > 1$  | accept   | g1             |
| Ab    | $Pts_t^A - Pts_t^B > 1$  | wait     | g2             |
| Ab    | $Pts_t^A - Pts_t^B < -1$ | accept   | g2             |
| Ab    | $Pts_t^A - Pts_t^B < -1$ | wait     | g1             |
| Ab    | $Pts_t^A - Pts_t^B = 1$  | accept   | g1             |
| Ab    | $Pts_t^A - Pts_t^B = 1$  | wait     | g2             |
| Ab    | $Pts_t^A - Pts_t^B = -1$ | accept   | nan            |
| Ab    | $Pts_t^A - Pts_t^B = -1$ | wait     | nan            |
| Ab    | $Pts_t^A - Pts_t^B = 0$  | accept   | g1             |
| Ab    | $Pts_t^A - Pts_t^B = 0$  | wait     | g2             |
| aB    | $Pts_t^A - Pts_t^B > 1$  | accept   | g2             |
| aB    | $Pts_t^A - Pts_t^B > 1$  | wait     | g1             |
| aB    | $Pts_t^A - Pts_t^B < -1$ | accept   | g1             |
| aB    | $Pts_t^A - Pts_t^B < -1$ | wait     | g2             |
| aB    | $Pts_t^A - Pts_t^B = 1$  | accept   | nan            |
| aB    | $Pts_t^A - Pts_t^B = 1$  | wait     | nan            |
| aB    | $Pts_t^A - Pts_t^B = -1$ | accept   | g1             |
| aB    | $Pts_t^A - Pts_t^B = -1$ | wait     | g2             |
| aB    | $Pts_t^A - Pts_t^B = 0$  | accept   | g1             |
| aB    | $Pts_t^A - Pts_t^B = 0$  | wait     | g2             |
